# Supplementary material for: Rationale and design of a randomised trial of intravenous iron in patients with heart failure
Source: PubMed Central journal article supplement (PMC9726969; doi:10.1136/heartjnl-2022-321304), 2022-08-10
Supplement: heartjnl-2022-321304supp001.pdf [file heartjnl-2022-321304supp001.pdf]

## Appendix 1: Schedule of Assessments

All visits should be performed within +/- 2 weeks of the documented visit time (e.g. 4 months +/- 2 weeks)

|                           | Screening                                                                                                                                                                                                                                                                                                     | Randomisation/<br>First Infusion | Visit 1                                                                                                                                                                                           | Visit 2                                                                                                                                                                                                                                                                                                                                                     | Visit 3  | Visit 4   | Visit 5   | Visit 6   | Visits 7 >                                                                      | Final patient<br>visit                                                                                                                                                                         |
|---------------------------|---------------------------------------------------------------------------------------------------------------------------------------------------------------------------------------------------------------------------------------------------------------------------------------------------------------|----------------------------------|---------------------------------------------------------------------------------------------------------------------------------------------------------------------------------------------------|-------------------------------------------------------------------------------------------------------------------------------------------------------------------------------------------------------------------------------------------------------------------------------------------------------------------------------------------------------------|----------|-----------|-----------|-----------|---------------------------------------------------------------------------------|------------------------------------------------------------------------------------------------------------------------------------------------------------------------------------------------|
| Time from inclusion       | <p>For hospitalised participants, these visits will be close together prior to discharge.</p> <p>For all participants, screening and randomisation must be completed using blood tests within 6 weeks of the respective visit.</p> <p>First infusion may be administered up to 7 days post-randomisation.</p> |                                  | 4 weeks                                                                                                                                                                                           | 4 months                                                                                                                                                                                                                                                                                                                                                    | 8 months | 12 months | 16 months | 20 months | 24 months and then 4-monthly until notified to schedule the final patient visit | <p>To be completed at participant's scheduled Final patient visit.</p> <p>Visit window to be notified by the CTU. LPLV is expected to be approximately 5.5 years from first randomisation.</p> |
|                           |                                                                                                                                                                                                                                                                                                               |                                  | <p>Bloods will be collected either during the study visit or in advance of visit (within 2 weeks) as part of standard clinical practice. Results must be available prior to any dosing visit.</p> | <p>Bloods will be collected either during the study visit or in advance of visit (within 3 weeks) as part of standard clinical practice, apart from blood for storage, which will be collected at the visit. Results must be available prior to any dosing visit.</p> <p>As the study is event driven, the final patient visit cannot be pre-specified.</p> |          |           |           |           |                                                                                 |                                                                                                                                                                                                |
| Consent                   | X                                                                                                                                                                                                                                                                                                             |                                  |                                                                                                                                                                                                   |                                                                                                                                                                                                                                                                                                                                                             |          |           |           |           |                                                                                 |                                                                                                                                                                                                |
| Demographics              | X                                                                                                                                                                                                                                                                                                             |                                  |                                                                                                                                                                                                   |                                                                                                                                                                                                                                                                                                                                                             |          |           |           |           |                                                                                 |                                                                                                                                                                                                |
| Medical history           | X                                                                                                                                                                                                                                                                                                             |                                  |                                                                                                                                                                                                   |                                                                                                                                                                                                                                                                                                                                                             |          |           |           |           |                                                                                 |                                                                                                                                                                                                |
| Medications (baseline)    | X                                                                                                                                                                                                                                                                                                             |                                  |                                                                                                                                                                                                   |                                                                                                                                                                                                                                                                                                                                                             |          |           |           |           |                                                                                 |                                                                                                                                                                                                |
| Medications (concomitant) |                                                                                                                                                                                                                                                                                                               |                                  | X                                                                                                                                                                                                 | X                                                                                                                                                                                                                                                                                                                                                           | X        | X         | X         | X         | X                                                                               | X                                                                                                                                                                                              |
| Inclusion/Exclusion       | X                                                                                                                                                                                                                                                                                                             | X                                |                                                                                                                                                                                                   |                                                                                                                                                                                                                                                                                                                                                             |          |           |           |           |                                                                                 |                                                                                                                                                                                                |
| Randomisation             |                                                                                                                                                                                                                                                                                                               | X                                |                                                                                                                                                                                                   |                                                                                                                                                                                                                                                                                                                                                             |          |           |           |           |                                                                                 |                                                                                                                                                                                                |
| N-BNP                     | X*                                                                                                                                                                                                                                                                                                            |                                  |                                                                                                                                                                                                   |                                                                                                                                                                                                                                                                                                                                                             |          |           |           |           |                                                                                 |                                                                                                                                                                                                |
| TSAT                      | X                                                                                                                                                                                                                                                                                                             |                                  | X**                                                                                                                                                                                               | X**                                                                                                                                                                                                                                                                                                                                                         | X**      | X**       | X**       | X**       | X**                                                                             | X**                                                                                                                                                                                            |

|                                                       |   |      |      |      |      |      |      |      |      |      |
|-------------------------------------------------------|---|------|------|------|------|------|------|------|------|------|
| Ferritin                                              | X |      | X**  | X**  | X**  | X**  | X**  | X**  | X**  | X**  |
| Creatinine/eGFR                                       | X | X^^  | X    | X    | X    | X    | X    | X    | X    | X    |
| Haemoglobin                                           | X | X^^  | X    | X    | X    | X    | X    | X    | X    | X    |
| MCV, MCHC, MCH                                        |   | X^^  |      | X    |      |      |      | X    |      |      |
| RDW^                                                  |   | X^^  |      | X    |      |      |      | X    |      |      |
| Platelets                                             |   | X^^  |      | X    |      |      |      | X    |      |      |
| Sodium, potassium, urea                               |   | X^^  |      | X    |      |      |      | X    |      |      |
| CRP                                                   |   | X^^  |      | X    |      |      |      | X    |      |      |
| Bilirubin^                                            |   | X^^  |      | X    |      |      |      | X    |      |      |
| Albumin^                                              |   | X^^  |      | X    |      |      |      | X    |      |      |
| Random glucose^                                       |   | X^^  |      | X    |      |      |      | X    |      |      |
| Bloods for storage (sub study)                        |   | X    |      | X    |      |      |      | X    |      |      |
| Infusion **                                           |   | X*** | X*** | X*** | X*** | X*** | X*** | X*** | X*** | X*** |
| Serious adverse events and events of special interest |   | X    | X    | X    | X    | X    | X    | X    | X    | X    |
| Injection reactions                                   |   | X**  | X**  | X**  | X**  | X**  | X**  | X**  | X**  | X**  |
| Minnesota questionnaire                               |   | X    |      | X    |      |      |      | X    |      |      |
| EQ-5D                                                 |   | X    | X    | X    | X    | X    | X    | X    | X    |      |
| Clinical Assessment                                   | X | X    | X    | X    | X    | X    | X    | X    | X    | X    |
| 6 minute walk test                                    |   | X    |      | X    |      |      |      | X    |      |      |
| ECG+                                                  | X |      |      |      |      |      |      |      |      |      |
| Pregnancy test**                                      |   | X++  | X++  | X++  | X++  | X++  | X++  | X++  | X++  | X++  |
| LVEF assessment#                                      | X |      |      |      |      |      |      |      |      |      |

## Notes:

1. X = assessments made as part of standard clinical practice for patients with chronic heart failure
2. X\* = outpatients only without admission in last 6 months
3. X\*\* = active treatment arm (iron) only i.e. 50% of recruits
4. ^ = if available
5. ^^ = use values from assessments within 6 weeks of randomisation if available
6. + = unless there are ECG results in the last 4 weeks prior to the visit
7. \*\* = for women of child-bearing potential receiving IMP.

8. \*\*\* = infusion will only be given to those patients in the IV iron arm who meet the re-dosing criteria. If bloods tests taken at the study visit, a separate infusion visit within 3 weeks will be required for those who need re-dosing (anticipated approximately every third visit for those in IV iron arm). If blood tests available within the 3 weeks before study visit then re-dosing, if required, can happen at the main study visit.
9. # = If required – an assessment can be carried out if not done in prior 2 years, or most recent result does not permit inclusion

**Visits 7 to the final patient visit will be held at 4-monthly intervals.**

(Note a 'month' is defined as a calendar month.)

#### Abbreviations

|       |                                           |
|-------|-------------------------------------------|
| CRP   | C-Reactive Protein                        |
| CTU   | Clinical Trials Unit                      |
| ECG   | Electrocardiogram                         |
| eGFR  | Estimated Glomerular Filtration Rate      |
| IMP   | Investigational Medicinal Product         |
| IV    | Intravenous                               |
| LPLV  | Last patient last visit                   |
| LVEF  | Left Ventricular Ejection Fraction        |
| MCH   | Mean Cell Haemoglobin                     |
| MCHC  | Mean Cell Haemoglobin Concentration       |
| MCV   | Mean Corpuscular Volume                   |
| N-BNP | N-terminal pro B-type Natriuretic Peptide |
| RDW   | Red blood cell Distribution Width         |
| TSAT  | Transferrin saturation                    |
