# Supplementary material for: Rationale and design of a randomised trial of intravenous iron in patients with heart failure
Source: PubMed Central journal article supplement (PMC9726969; doi:10.1136/heartjnl-2022-321304), 2022-08-10
Supplement: heartjnl-2022-321304supp003.pdf [file heartjnl-2022-321304supp003.pdf]

### Appendix 3: Committee Membership

#### Trial Steering Committee

|                          |                                                  |
|--------------------------|--------------------------------------------------|
| Dr Nicholas Boon (Chair) | Independent Member                               |
| Dr Shannon Amoils        | British Heart Foundation, non-voting             |
| Dr Callum Chapman        | Co-applicant                                     |
| Prof John Cleland        | Co-applicant                                     |
| Dr Thomas Goldin Diness  | Pharmacosmos, non-voting                         |
| Prof Ian Ford            | Study Director                                   |
| Prof Paul Kalra          | Chief Investigator                               |
| Prof Philip Kalra        | Co-applicant                                     |
| Prof Iain Macdougall     | Co-applicant                                     |
| Prof John McMurray       | Independent Member                               |
| Mr Richard Mindham       | Independent Member, Patient representative       |
| Prof Mark Petrie         | Co-applicant                                     |
| Dr Pamela Sandu          | Sponsor Representative, non-voting               |
| Prof Iain Squire         | Co-applicant                                     |
| Dr Claes Christian Strom | Pharmacosmos, non-voting (past member)           |
| Ms Elizabeth Thomson     | Project Manager, non-voting                      |
| Dr Maureen Travers       | Sponsor Representative, non-voting (past member) |
| Prof Robert Wilcox       | Independent Member                               |

#### Independent Data Monitoring Committee

Prof Allan Struthers (Chair)  
Prof Patrick Mark  
Prof Chris Weir

#### Clinical Endpoint Committee

Prof John Cleland (Chair)  
Dr Fraser Graham  
Dr Pierpaolo Pellicori

Trial Management Group

|                              |                                                  |
|------------------------------|--------------------------------------------------|
| Ms Elizabeth Thomson (Chair) | Senior Project Manager                           |
| Ms Claire Brunton            | Project Manager                                  |
| Prof John Cleland            | Clinical Endpoint Committee Chair                |
| Ms Anna Cunnington           | Research Coordinator (Portsmouth)                |
| Ms Lisa Hall                 | Administrative Assistant (past member)           |
| Dr Elizabeth Douglas         | Senior Clinical Trials Pharmacist                |
| Dr Margaret Fegen            | Academic Clinical Trial Monitor                  |
| Prof Ian Ford                | Study Director                                   |
| Ms Serena Howe               | Senior Research Nurse                            |
| Dr Marc Jones                | Pharmacovigilance Manager                        |
| Prof Paul Kalra              | Chief Investigator                               |
| Ms Sharon Kean               | Director of Information Systems (past member)    |
| Dr Sheila McGowan            | Academic Lead Clinical Trial Monitor             |
| Ms Jill Nicholls             | Heart Failure Specialist Nurse                   |
| Prof Mark Petrie             | Scottish Site Coordinator                        |
| Dr Barbara Ross              | Academic Clinical Trial Monitor (past member)    |
| Dr Pamela Sandu              | Sponsor Research Coordinator                     |
| Dr Debra Stuart              | Head of Research Regulation and Compliance       |
| Ms Pamela Surtees            | Specialist Pharmacy Technician - Clinical Trials |
| Dr Maureen Travers           | Sponsor Research Coordinator (past member)       |

Trial Coordination

Portsmouth: Professor Paul Kalra (Chief Investigator), Anna Cunnington (Research Coordinator)

Robertson Centre for Biostatistics: Elizabeth Thomson (Project Management), Professor Ian Ford (Study Director), Michele Robertson and Nicola Greenlaw (Biostatistics), Sharon Kean (Information systems), Eleanor Dinnett (End points and clinical coding), Ross Clarke, Christopher Graham, Alan Stevenson and Robbie Wilson (eCRF), Sarah Boyle (Data Management), Lisa Hall and Joanne Woollard (Projects Administration), Claire Brunton and Amanda Reid (Endpoints Coordination)
