# Supplementary material for: Rationale and design of a randomised trial of intravenous iron in patients with heart failure
Source: PubMed Central journal article supplement (PMC9726969; doi:10.1136/heartjnl-2022-321304), 2022-08-10
Supplement: heartjnl-2022-321304supp004.pdf [file heartjnl-2022-321304supp004.pdf]

Appendix 4: Principal Investigators of sites who randomised at least one patient to the IRONMAN trial

|                                     |                                                              |
|-------------------------------------|--------------------------------------------------------------|
| Prof Paul Kalra                     | Queen Alexandra Hospital                                     |
| Prof Mark Petrie                    | Glasgow Royal Infirmary and Golden Jubilee National Hospital |
| Dr Ninian Lang                      | Queen Elizabeth University Hospital                          |
| Prof Philip Kalra                   | Salford Royal Hospital                                       |
| Dr Jason Glover                     | Basingstoke and North Hampshire Hospital                     |
| Prof Iain Squire                    | Glenfield Hospital                                           |
| Dr Sue Ellery                       | Royal Sussex County Hospital                                 |
| Dr Gethin Ellis                     | Royal Glamorgan Hospital                                     |
| Dr Callum Chapman                   | West Middlesex University Hospital                           |
| Dr Fozia Ahmed                      | Manchester Royal Infirmary                                   |
| Dr Ben Szwejkowski & Prof Chim Lang | Ninewells Hospital                                           |
| Dr Clare Murphy                     | Royal Alexandra Hospital                                     |
| Dr Charlotte Manisty                | St Bartholomew's Hospital and University College Hospital    |
| Prof Andrew Clark                   | Castle Hill Hospital                                         |
| Prof Stephen Leslie                 | Raigmore Hospital                                            |
| Dr Colin Petrie                     | University Hospital Monklands                                |
| Dr Alan Japp                        | Royal Infirmary of Edinburgh                                 |
| Dr Jay Wright                       | Liverpool Heart and Chest Hospital                           |
| Dr Chris Critoph                    | Royal Bournemouth Hospital                                   |
| Dr Andrew Hannah                    | Aberdeen Royal Infirmary                                     |
| Dr Andrew Ludman                    | Royal Devon and Exeter Hospital                              |
| Prof Prithwish Banerjee             | University Hospitals Coventry and Warwickshire               |
| Dr Susan Piper                      | King's College Hospital                                      |
| Dr Geraint Jenkins                  | Morrison Hospital                                            |
| Dr Victor Chong                     | University Hospital Crosshouse                               |
| Dr Simon Williams                   | Wythenshawe Hospital                                         |
| Dr Rebecca Lane                     | Royal Brompton and Harefield Hospital                        |
| Dr Patrick Donnelly                 | Ulster Hospital                                              |
| Dr Paul Foley                       | Great Western Hospital                                       |
| Dr Andrew Marshall                  | District General Hospital                                    |
| Dr Amal Muthamala                   | North Middlesex University Hospital                          |
| Dr Philip Campbell                  | Royal Gwent Hospital                                         |
| Dr Rajiv Sankaranarayanan           | Aintree University Hospital                                  |
| Dr Preeti Gupta & Dr Victor Sim     | University Hospital Llandough                                |
| Dr Peter Cowburn                    | University Hospital Southampton                              |
| Dr Ameet Bakhai                     | Barnet Hospital                                              |
| Dr Kristopher Lyons                 | Antrim Area Hospital                                         |
| Dr Alison Seed                      | Blackpool Victoria Hospital                                  |
| Dr Sudantha Bulugahapitiya          | Bradford Royal Infirmary                                     |
| Dr Justin Cooke                     | Chesterfield Royal Hospital                                  |
| Prof Jerry Murphy                   | Darlington Memorial Hospital                                 |
| Dr Catherine Labinjoh               | Forth Valley Royal Hospital                                  |
| Dr Piers Clifford                   | Hammersmith Hospital and Wycombe Hospital                    |
| Dr Charles Spencer                  | New Cross Hospital                                           |

|                                      |                                 |
|--------------------------------------|---------------------------------|
| Dr John Walsh                        | City Hospital                   |
| Dr Christopher Boos                  | Poole Hospital                  |
| Dr Abdallah Al-Mohammad              | Northern General Hospital       |
| Dr Thuraia Nageh                     | Southend University Hospital    |
| Dr Mark Francis                      | Victoria Hospital               |
| Dr Iain Matthews                     | Wansbeck General Hospital       |
| Dr Sam McClure & Dr John Baxter      | Sunderland Royal Hospital       |
| Dr Philip Keeling                    | Torbay Hospital                 |
| Dr Lana Dixon                        | Royal Victoria Hospital         |
| Dr Rebekah Schiff                    | Guy's and St Thomas' Hospital   |
| Dr Ahmed Elzayat & Dr Alastair Cooke | Doncaster Royal Infirmary       |
| Dr Simon Duckett                     | Royal Stoke University Hospital |
| Dr Robin Ray                         | St George's Hospital            |
| Dr Reto Gamma                        | Broomfield Hospital             |
| Dr Eleanor Wicks                     | John Radcliffe Hospital         |
| Dr Thomas Jackson                    | Salisbury District Hospital     |
| Dr Tapeshe Pakrashi                  | Kingston Hospital               |
| Dr Jolanta Sobolewska                | Royal Oldham Hospital           |
| Dr Henry Savage                      | Basildon University Hospital    |
| Dr Yuk-ki Wong                       | St Richard's Hospital           |
| Dr Aaron Wong                        | Princess of Wales Hospital      |
| Dr Angus Nightingale                 | Bristol Royal Infirmary         |
| Dr Parminder Chaggar                 | Royal Cornwall Hospital         |
